# Supplementary material
Source: PubMed Central journal article supplement (PMC8387952)

## Supplemental Online Content

Kennedy GT, Azari FS, Bernstein E, et al. Targeted intraoperative molecular imaging for localizing nonpalpable tumors and quantifying resection margin distances. *JAMA Surg*. Published online August 25, 2021. doi:10.1001/jamasurg.2021.3757

**eFigure 1.** Lesion characteristics stratified by intraoperative palpability of the lesion

**eFigure 2.** Lesion fluorescence and ROC evaluation

**eFigure 3.** Method of quantifying resection margins using IMI

This supplemental material has been provided by the authors to give readers additional information about their work.



**eFigure 2. Lesion fluorescence and ROC evaluation. a, Signal-to-background ratio (SBR) of lesions compared to normal lung parenchyma as background. b, Receiver operative characteristic (ROC) curve evaluation showed that high areas under the curve (AUCs) were obtained for MFI both *in vivo* and *ex vivo*.**

**a**

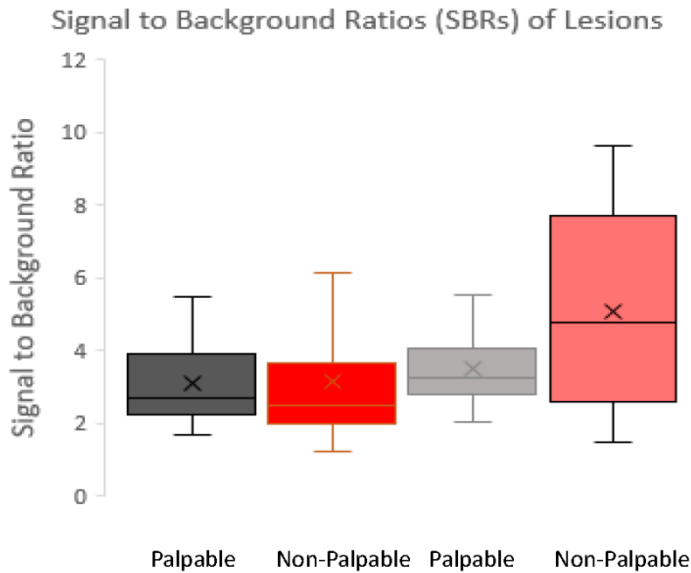

**b**

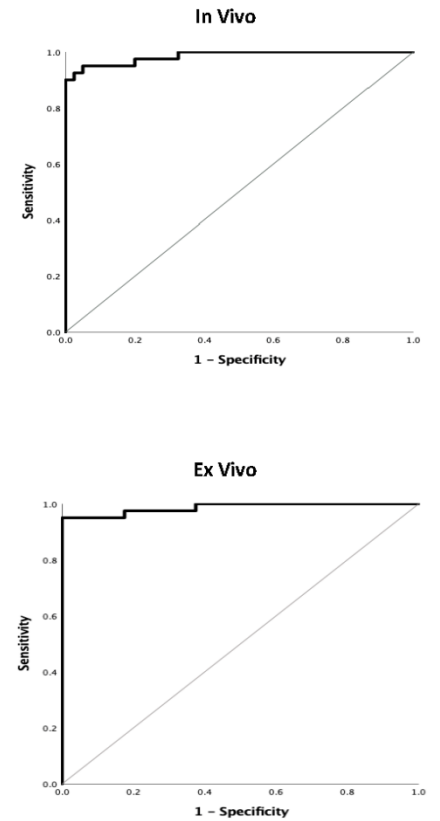

**eFigure 3. Method of quantifying resection margins using IMI. a, White light and near infrared (NIR) images of resected specimen. b, Method of calculating margin distance by calibration to a ruler and comparing to the distance to the outer edge of the staple line.**

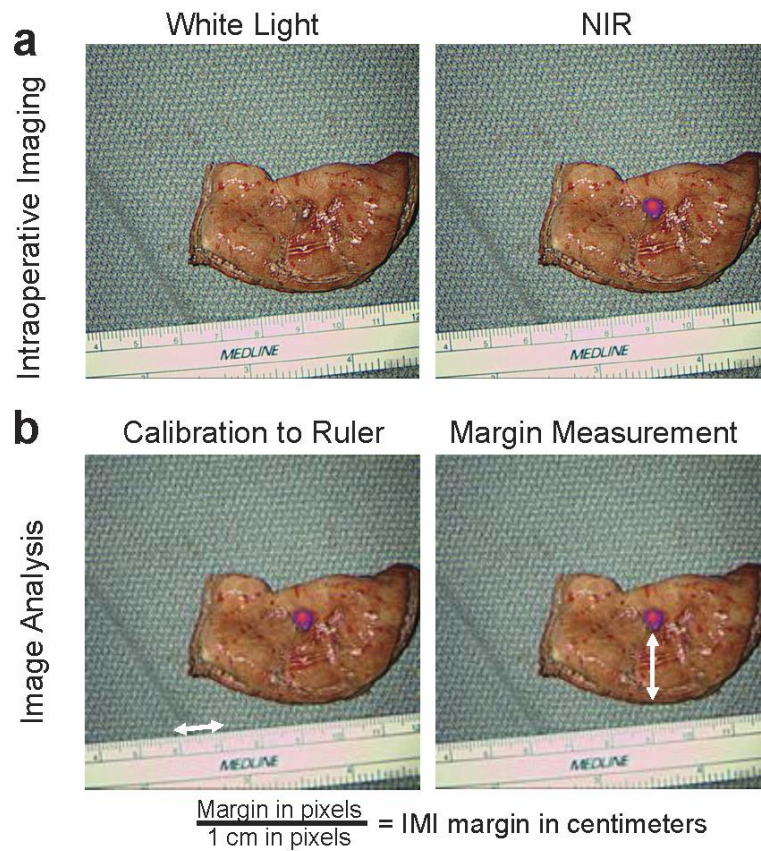

Supplement: jamasurg-e213757-s001.pdf [file jamasurg-e213757-s001.pdf]
